# Supplementary material for: Synthesis of novel vanillin derivatives: novel multi-targeted scaffold ligands against Alzheimer's disease
Source: Royal Society of Chemistry journal article supplement (doi:10.1039/c9md00048h), 2019-01-01
Supplement: c9md00048h1.pdf [file c9md00048h1.pdf]

## Supporting Information (SI)

### Synthesis of novel vanillin derivatives: novel multi-targeted scaffold ligands against Alzheimer's disease

Matteo Scipioni<sup>1</sup>, Graeme Kay<sup>1</sup>, Ian L Megson<sup>2</sup>, Paul Kong Thoo Lin\*<sup>1</sup>

<sup>1</sup>*School of Pharmacy and Life sciences, Robert Gordon University, Aberdeen, UK*

<sup>2</sup>*Institute of Health Research & Innovation, University of the Highlands and Islands, Inverness, UK*

# Compound I-1

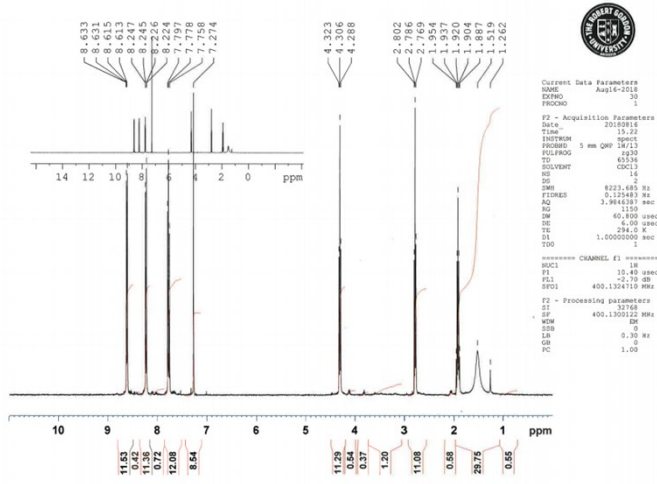

Current Data Parameters  
 NAME Aug16-2018  
 EXPRNO 1  
 PROCNO 1

F2 - Acquisition Parameters  
 Date\_ 20180816  
 Time 15.22  
 INSTRUM spect  
 PROBRD 5 mm QNP 1H/13  
 PULPROG zgpg30  
 TD 65536  
 SOLVENT CDCl3  
 NS 4  
 DS 2  
 SWH 8233.461 Hz  
 FIDRES 0.122483 Hz  
 AQ 1.9614187 sec  
 RG 3200  
 SQ 40150  
 SNR 4.000 usec  
 TE 294.2 K  
 DE 1.00000000 sec  
 TDO 1

===== CHANNEL f1 =====  
 NU1 1H  
 P1 19.49 usec  
 PL1 0.0012139 dB  
 SFO1 400.114189 MHz

F2 - Processing parameters  
 SI 32768  
 SF 400.114005 MHz  
 WDW EM  
 SSB 0  
 GB 0.30 Hz  
 PC 1.00

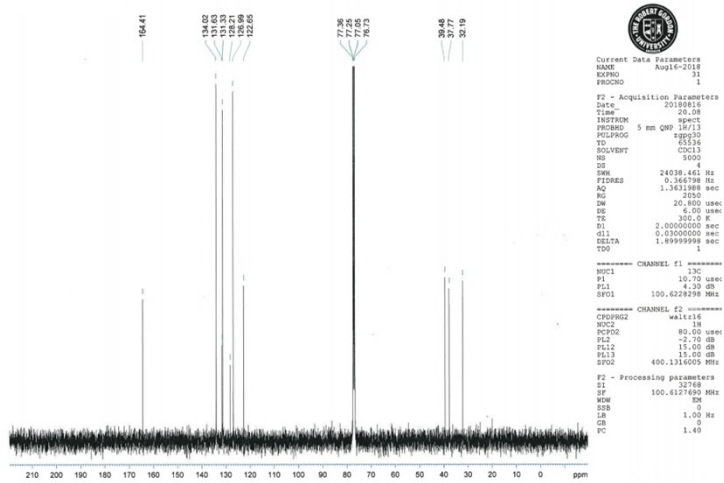

Current Data Parameters  
 NAME Aug16-2018  
 EXPRNO 1  
 PROCNO 1

F2 - Acquisition Parameters  
 Date\_ 20180816  
 Time 20.08  
 INSTRUM spect  
 PROBRD 5 mm QNP 1H/13  
 PULPROG zgpg30  
 TD 65536  
 SOLVENT CDCl3  
 NS 4  
 DS 2  
 SWH 24038.461 Hz  
 FIDRES 0.360798 Hz  
 AQ 1.3633288 sec  
 RG 3200  
 SQ 40150  
 SNR 4.000 usec  
 TE 300.0 K  
 DE 1.00000000 sec  
 d11 0.03000000 sec  
 DELTA 1.89999999 sec  
 TDO 4

===== CHANNEL f1 =====  
 NU1 13C  
 P1 10.70 usec  
 PL1 1.3633288 dB  
 SFO1 100.6228298 MHz

===== CHANNEL f2 =====  
 CPDPRG2 waltz16  
 NU2 1H  
 P2 89.00 usec  
 PL2 -1.70 dB  
 PL12 15.00 dB  
 PL1 15.00 dB  
 SFO2 400.1314005 MHz

F2 - Processing parameters  
 SI 32768  
 SF 100.6127892 MHz  
 WDW EM  
 SSB 1.00 Hz  
 GB 1.40

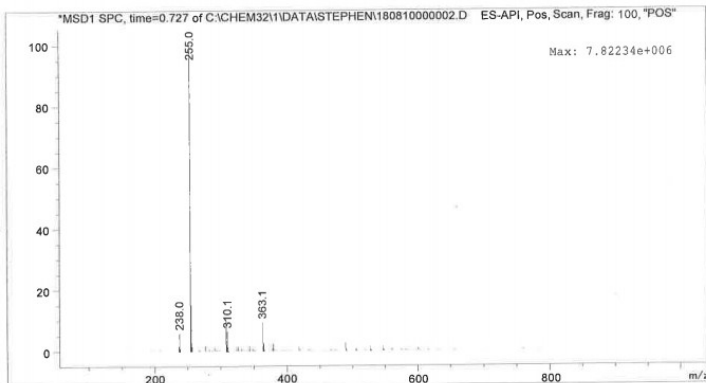

# Compound 1

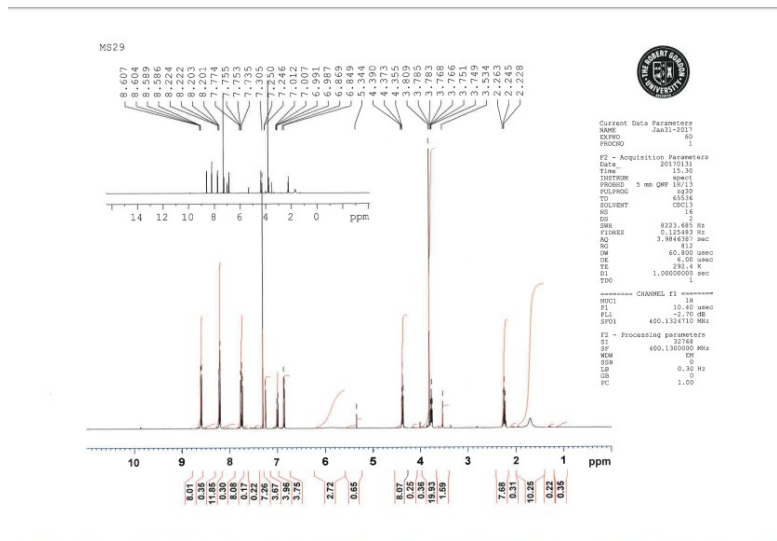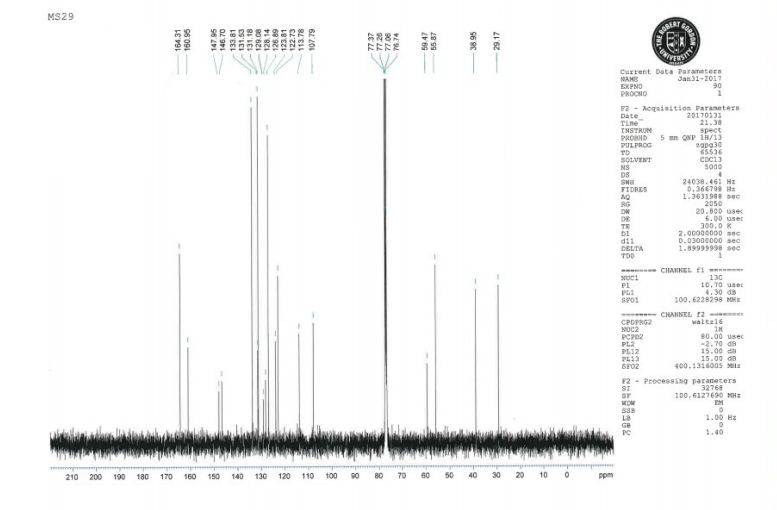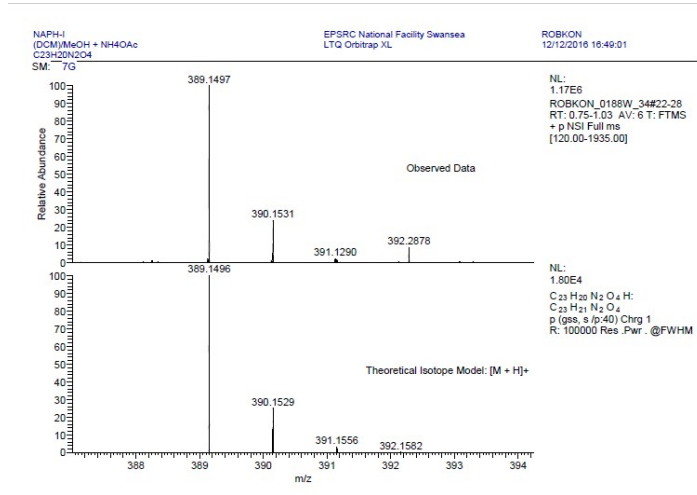

# Compound 2

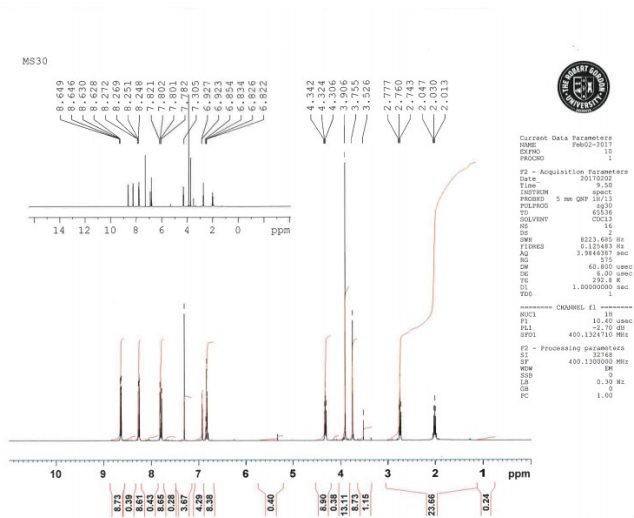

Current Data Parameters  
 NAME: Feb02-2017  
 EXPNO: 1  
 PROCNO: 1  
 F2 - Acquisition Parameters  
 Date\_: 20170202  
 Time: 9.32  
 INSTRUM: spect  
 PROBHD: 5 mm QNP 1H/1  
 PULPROG: zgpg30  
 TD: 65536  
 SOLVENT: CDCl3  
 NS: 16  
 DS: 2  
 SWH: 8223.685 Hz  
 FIDRES: 0.122483 Hz  
 AQ: 3.7844387 sec  
 RG: 275  
 SW: 40.800 MHz  
 US: 6.000 MHz  
 TE: 295.2 K  
 DQ: 1.0000000 sec  
 ===== CHANNEL f1 =====  
 NUC1: 1H  
 P1: 16.40 usec  
 PL1: -2.00 dB  
 SFO1: 400.1324710 MHz  
 F2 - Processing parameters  
 SI: 32768  
 SF: 400.1300000 MHz  
 WDW: DM  
 SSB: 0  
 LB: 0.30 Hz  
 GB: 0  
 PC: 1.00

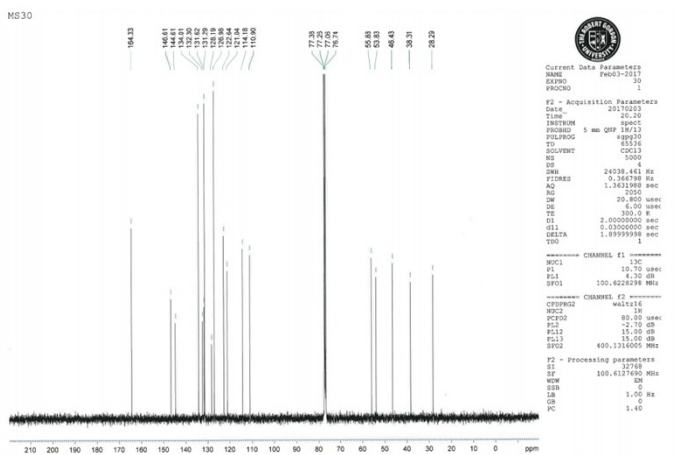

Current Data Parameters  
 NAME: Feb02-2017  
 EXPNO: 3  
 PROCNO: 1  
 F2 - Acquisition Parameters  
 Date\_: 20170202  
 Time: 20.20  
 INSTRUM: spect  
 PROBHD: 5 mm QNP 1H/1  
 PULPROG: zgpg30  
 TD: 65536  
 SOLVENT: CDCl3  
 NS: 5000  
 DS: 24938.464 Hz  
 SWH: 1.582188 MHz  
 FIDRES: 1.631398 Hz  
 AQ: 2.0000000 sec  
 RG: 250  
 SW: 20.800 MHz  
 US: 6.000 MHz  
 TE: 299.0 K  
 DQ: 2.0000000 sec  
 GB: 0  
 GB1: 0.0300000 sec  
 UDELTA: 1.8995938 sec  
 TD0: 1  
 ===== CHANNEL f1 =====  
 NUC1: 13C  
 P1: 16.70 usec  
 PL1: 4.30 dB  
 SFO1: 100.6228288 MHz  
 ===== CHANNEL f2 =====  
 NUC2: 1H  
 P2: 62.00 usec  
 PL2: -2.70 dB  
 PL12: -15.00 dB  
 SFO2: 400.1316000 MHz  
 F2 - Processing parameters  
 SI: 32768  
 SF: 100.6127690 MHz  
 WDW: DM  
 SSB: 0  
 LB: 1.00 Hz  
 GB: 0  
 PC: 1.40

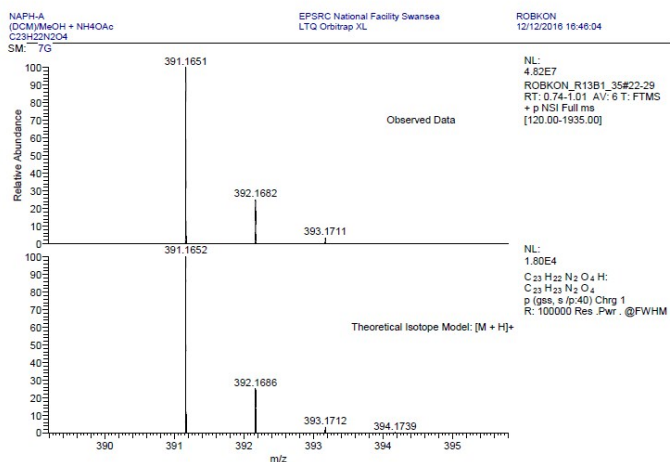

# Compound 3

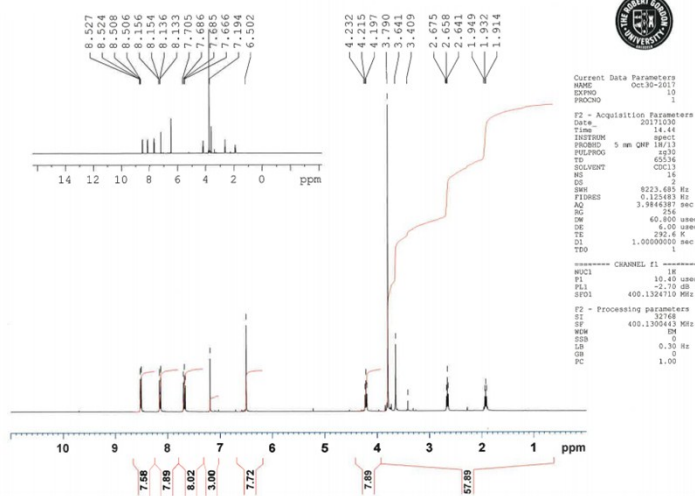

Current Data Parameters  
 NAME Oct30-2017  
 EXPNO 10  
 PROCNO 1

F2 - Acquisition Parameters  
 Date\_ 20171030  
 Time 14:44  
 INSTRUM spect  
 PROBRID 5 mm QNP 1H/13  
 PULPROG zgpg30  
 TO 65336  
 SOLVENT CDCl3  
 NS 16  
 DS 8233.68 Hz  
 FIDRES 0.120483 Hz  
 AQ 3.984638 sec  
 RG 256  
 DW 60.800 usec  
 DE 6.00 usec  
 TE 300.2 K  
 TD 1.0000000 sec  
 TQ 0

----- CHANNEL f1 -----  
 NUC1 13  
 P1 10.40 usec  
 PL1 -2.50 dB  
 SFO1 400.1324110 MHz

F2 - Processing parameters  
 SI 32768  
 SF 400.1300443 MHz  
 WDW EM  
 SSB 0  
 LB 0.30 Hz  
 GB 0  
 PC 1.00

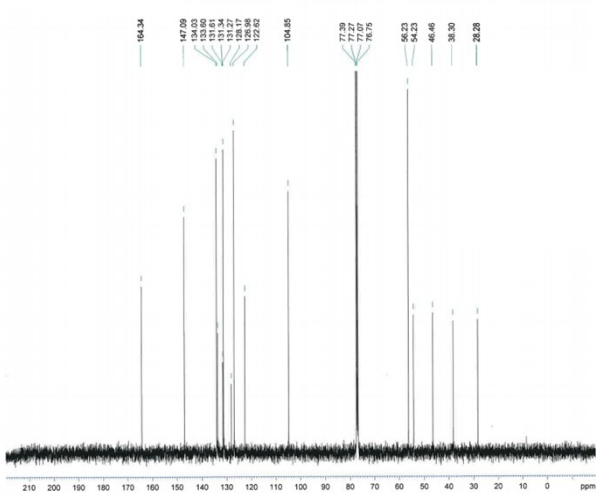

Current Data Parameters  
 NAME Oct30-2017  
 EXPNO 20  
 PROCNO 1

F2 - Acquisition Parameters  
 Date\_ 20171030  
 Time 15:03  
 INSTRUM spect  
 PROBRID 5 mm QNP 1H/13  
 PULPROG zgpg30  
 TO 65336  
 SOLVENT CDCl3  
 NS 1200  
 DS 24039.464 Hz  
 FIDRES 0.356798 Hz  
 AQ 1.3931988 sec  
 RG 2050  
 DW 20.800 usec  
 DE 6.00 usec  
 TE 300.2 K  
 TD 2.0000000 sec  
 TQ 0.0300000 sec  
 DELTA 1.8999999 sec  
 TQ 0

----- CHANNEL f1 -----  
 NUC1 13  
 P1 10.70 usec  
 PL1 -2.50 dB  
 SFO1 100.6282298 MHz

----- CHANNEL f2 -----  
 CPROG2 waltz16  
 NUC2 1H  
 P2 65.00 usec  
 PL2 -2.70 dB  
 PL12 15.00 dB  
 PL13 5.00 dB  
 SFO2 400.1316050 MHz

F2 - Processing parameters  
 SI 32768  
 SF 100.6127680 MHz  
 WDW EM  
 SSB 0  
 LB 1.00 Hz  
 GB 0  
 PC 1.40

NS  
 (DCM)/MeOH + NH4OAc  
 C24H24N2O5  
 SM: 7G

EPSRC National Facility Swansea  
 LTQ Orbitrap XL

ROBKON  
 14/11/2017 16:04:00

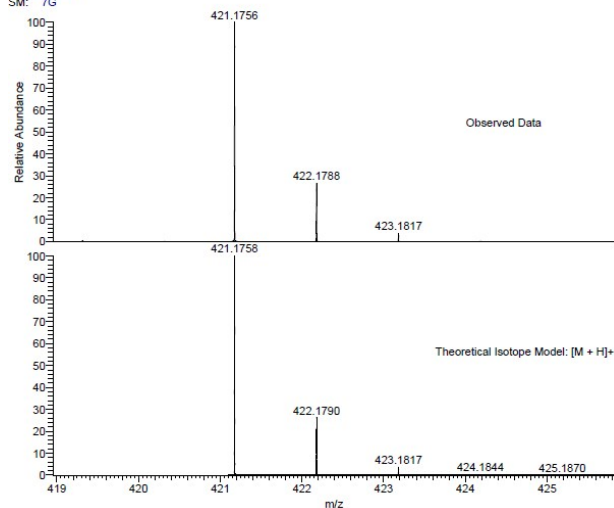

NL:  
 4.79E6  
 ROBKON\_93CTM\_38304#41-  
 S4 RT: 0.72-1.04 AV: 12 T:  
 FTMS + p NSI Full ms  
 [120.00-1935.00]

NL:  
 1.77E4  
 C24 H24 N2 O5 H:  
 C24 H25 N2 O5  
 p (gas, s /p/40) Chrg 1  
 R: 100000 Res. Pw. @FWHM

# Compound I-2

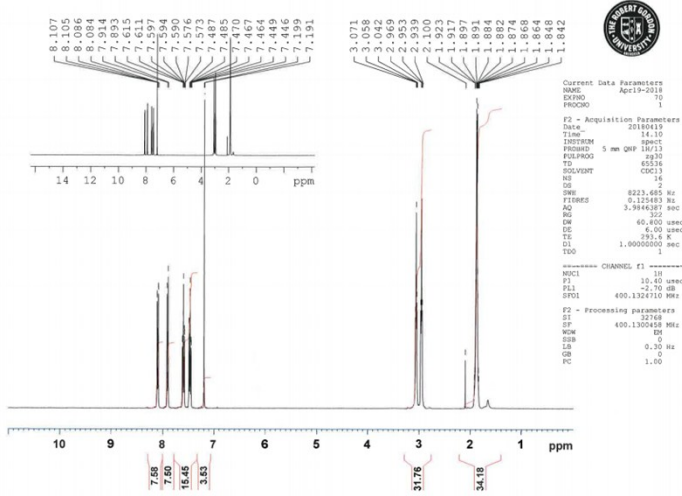

Current Data Parameters  
 NAME: ApCl-2018  
 EXPR: 10  
 PROCNO: 1

F2 - Acquisition Parameters  
 Date: 20180419  
 Time: 14.10  
 INSTRUM: spect  
 PROBRD: 5 mm QNP 1H/13  
 F2P1PRG: zgpg30  
 TD: 65536  
 SOLVENT: CDCl3  
 NS: 16  
 DS: 2  
 SWH: 8233.685 Hz  
 FIDRES: 0.132483 Hz  
 AQ: 3.9946327 sec  
 RG: 66.000 usec  
 DE: 6.00 usec  
 TE: 293.2 K  
 D1: 1.90000000 sec  
 TSD: 1

----- CHANNEL f1 -----  
 NUC1: 13C  
 P1: 10.00 usec  
 PL1: -2.00 dB  
 SFO1: 400.1324710 MHz

F2 - Processing parameters  
 SI: 32768  
 SF: 400.1300458 MHz  
 NQ: 40  
 SSB: 0.00 Hz  
 LA: 0.30 Hz  
 GB: 1.00  
 PC: 1.00

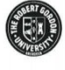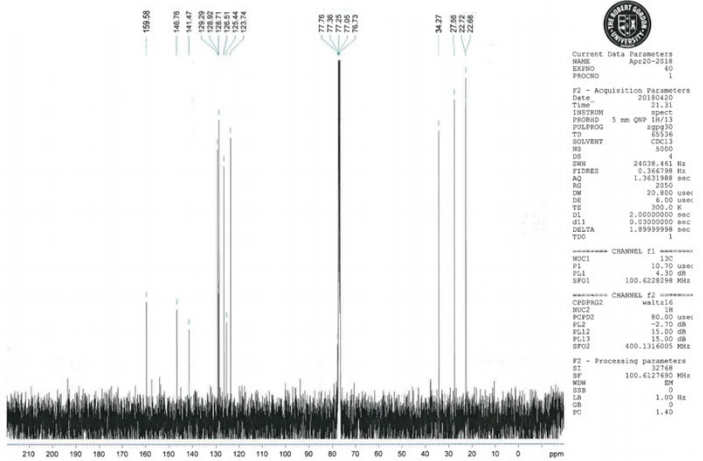

Current Data Parameters  
 NAME: ApCl-2018  
 EXPR: 40  
 PROCNO: 1

F2 - Acquisition Parameters  
 Date: 20180419  
 Time: 21.31  
 INSTRUM: spect  
 PROBRD: 5 mm QNP 1H/13  
 F2P1PRG: zgpg30  
 TD: 65536  
 SOLVENT: CDCl3  
 NS: 5000  
 DS: 4  
 SWH: 24038.441 Hz  
 FIDRES: 0.362788 Hz  
 AQ: 1.3821888 sec  
 RG: 7850  
 DE: 20.800 usec  
 TE: 300.2 K  
 D1: 2.00000000 sec  
 d11: 0.03000000 sec  
 DELTA: 1.99999998 sec  
 TSD: 1

----- CHANNEL f1 -----  
 NUC1: 13C  
 P1: 10.70 usec  
 PL1: 4.30 dB  
 SFO1: 100.6228298 MHz

----- CHANNEL f2 -----  
 NUC2: 1H  
 P2P1: 80.00 usec  
 PL2: -2.00 dB  
 PL12: 15.00 dB  
 PL1: 15.00 dB  
 SFO2: 400.1316005 MHz

F2 - Processing parameters  
 SI: 32768  
 SF: 100.6127490 MHz  
 NQ: 40  
 SSB: 1.00 Hz  
 LA: 0  
 GB: 1.40  
 PC: 1.40

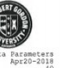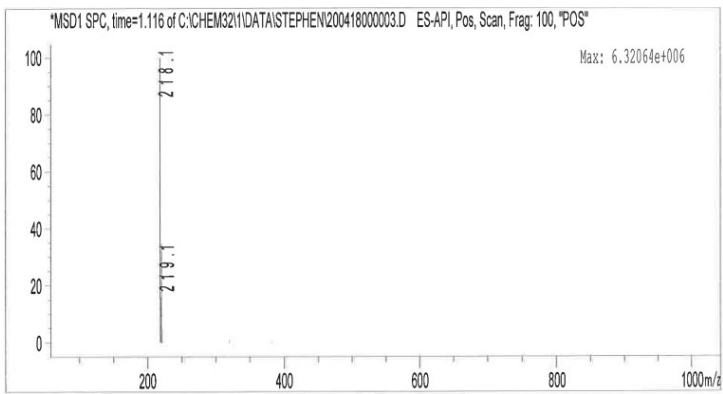

# Compound I-3

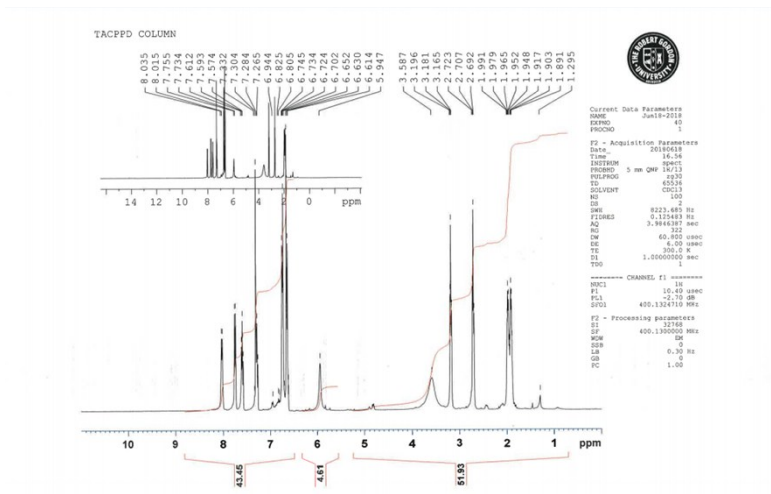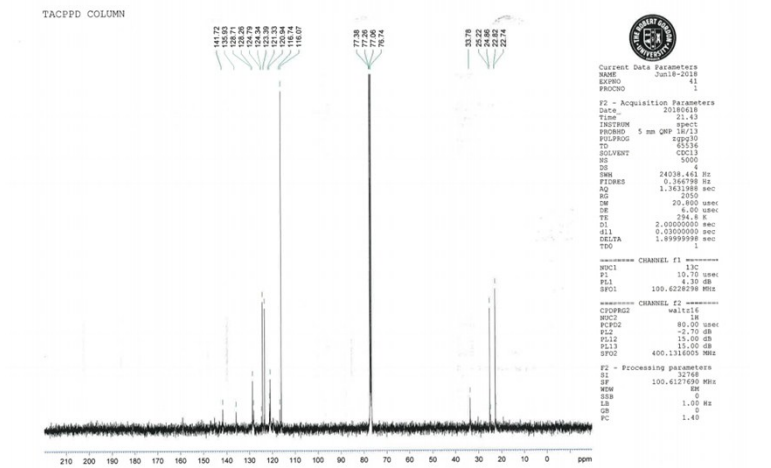

## Tacppd

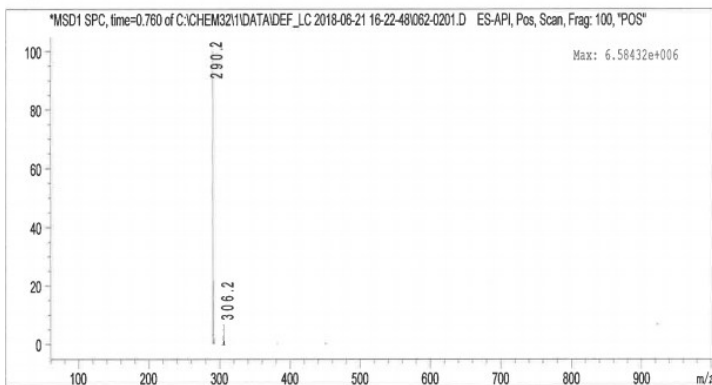

# Compound 4

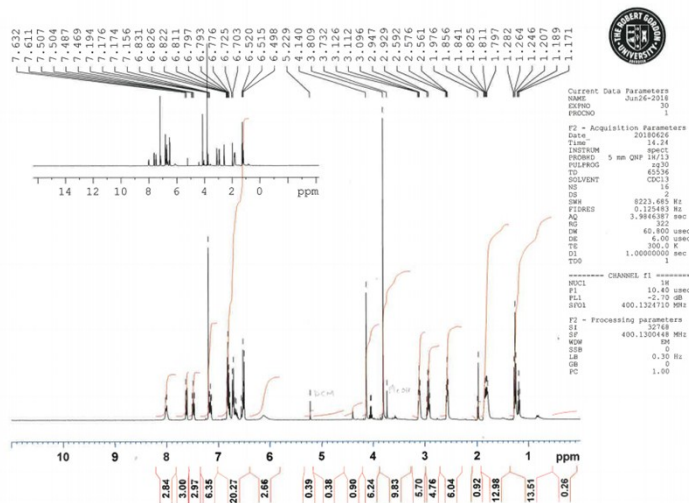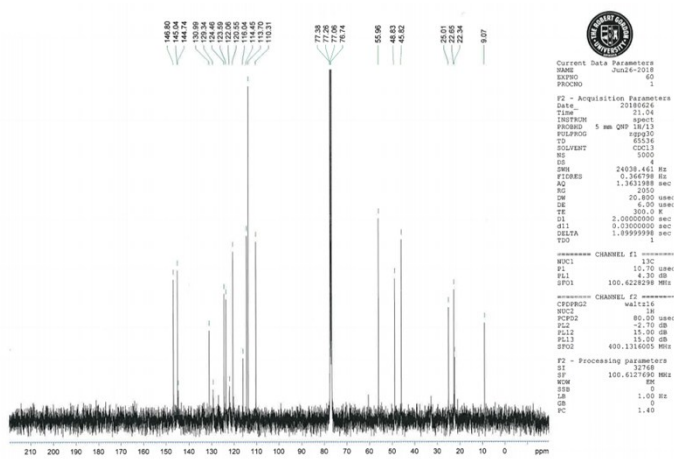

MS41  
(MeOH)/MeOH.NH4OAc  
C27H27N3O2

EPSC National Facility Swansea  
LTO Orbitrap XL

ROBKON  
28/09/2018 12:06:37

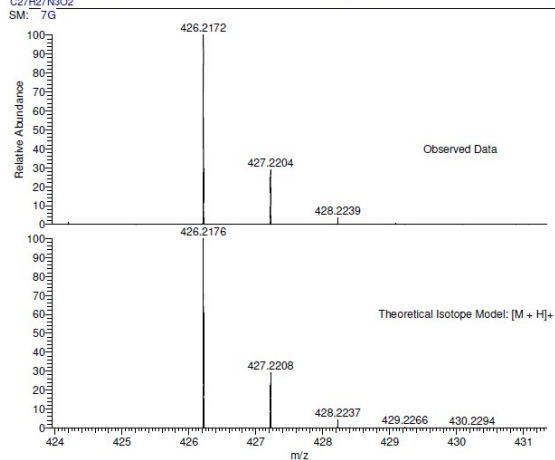

NL:  
7.32E6  
ROBKON\_93KP9\_48091#42-  
56 RT: 0.74-1.02 AV: 11 T:  
FTMS + p NSI Full ms  
[120.00-1935.00]

NL:  
1.72E4  
C27H27N3O2 H:  
C27H28N3O2  
p (gss, s [p-4]) Chg 1  
R: 100000 Res.Fwhm . @FWHM
